# Supplementary material
Source: PubMed Central journal article supplement (PMC5725376)
Supplement: 12264_2017_156_MOESM1_ESM.pdf [file 12264_2017_156_MOESM1_ESM.pdf]

## Supplementary Materials

### Transcriptome Sequencing Reveals Astrocytes as a Therapeutic Target in Heat-Stroke

Bing Niu, Tao Zhang, Huaiqiang Hu, Bingzhen Cao

**Table S1. Primers for qPCR**

| Gene name | Primer sequence (5' to 3') |
|-----------|----------------------------|
| GAPDH-F   | ACTTTGGCATCGTGGAAGGG       |
| GAPDH-R   | TGCAGGGATGATGTTCTGGG       |
| HSP70-F   | GGACCAACCACCTCAAGCA        |
| HSP70-R   | TCATTCTCTGTGTACAGGCCG      |
| CCR1-F    | GCCATTGTCCATGCAGTGTT       |
| CCR1-R    | GTCTTCAGGCTCTCATCGGG       |
| CCL3-F    | ATGGACGGCAAATTCCACGA       |

|         |                        |
|---------|------------------------|
| CCL3-R  | GGGTTCCCTTGCTGCCTCTAA  |
| CCL4-F  | CACCTCCCGGAAGATTCATCG  |
| CCL4-R  | CTGGGGTTCGGCACAGATTT   |
| IL2RB-F | ACCAATAGCTCTGGGCAACAG  |
| IL2RB-R | GGCATCAGTGTTTAGAGTCAGG |
| GDF5-F  | CGGCTGAGTCCCATTAGCAT   |
| GDF5-R  | AGCCACAAGATTCCACGACC   |
| CXCL2-F | GTCAATGCCTGACGACCCTA   |
| CXCL2-R | GACGATCCTCTGAACCAAGGG  |
| C6-F    | AAGCAGATTCAGGGTGCCTC   |
| C6-R    | ATCCCACAGCTTTGAATCCAG  |
| FGA-F   | GTGGTCACTTCGGATGATGGT  |
| FGA-R   | CTTGTGAGTGAACCAAAGCGG  |
| F9-F    | GAGTTCCACTGGTTGACCGA   |

|          |                         |
|----------|-------------------------|
| F9-R     | CCTTCACGGTAACCTGCACA    |
| C2-F     | CTTGAGCGGAGGTACAGGTTT   |
| C2-R     | TTGTTGGAGGAACCGTGACAA   |
| IL7-F    | TGTAGTAGCAACCTCCAAGAACT |
| IL7-R    | CCAGGAGGCATCCAGAACTT    |
| IL6R-F   | ATTCGAGCTTCGATACCGACC   |
| IL6R-R   | CTCTGCTAGCCAAGGAGTGC    |
| Aqp4-F   | TTCCACATCTCAGAGACACTGC  |
| Aqp4-R   | GCCATCAGTGGGGTTAGAGC    |
| Slc1a3-F | GCCGGGATTGTTGAACACTTG   |
| Slc1a3-R | CCTCAATCACGGAGTTCCCC    |
| Cldn5-F  | TTCGAAAGACCGATGTGGG     |
| Cldn5-R  | TCAACGACCCCTCTCTGTGA    |
| Flt1-F   | ATGTGCCAAACGGCTTTCAC    |

|         |                      |
|---------|----------------------|
| Flt1-R  | TGGTGCATGGTCCTGTTGTT |
| Tnf-F   | CATCCGTTCTCTACCCAGCC |
| Tnf-R   | AATTCTGAGCCCGGAGTTGG |
| Mbp-F   | GTGGGGGTAAGAGAAACGCA |
| Mbp-R   | CGAACACTCCTGTGGAACGA |
| Tubb3-F | CCTTCCTCCACTGGTACACG |
| Tubb3-R | TGCAAGCAACTTCACTTGGG |
| Enpp6-F | GCCTTCGGACCTGCTATCTG |
| Enpp6-R | AGCCTCCAGGAAGCAATCTT |
| Nfasc-F | GACGCATTCAGGAGAGGACA |
| Nfasc-R | GCTAGACGCCTTGTGTCTGT |
| Cspg4-F | GCAAACGCAACAAGACAGGT |
| Cspg4-R | GTGTCACCAGCTAGGCCATT |
| Igf2-F  | TTGGCCCTCCTGGAGACATA |

Igf2-R

GTATCTGGGGAAGTCGTCCG

Rdh10-F

TTCAGAGGCTGCCGAATCAG

Rdh10-R

GTACATGAGACGAGGGGTGC

---



Table S3. Functional annotation clustering of astrocytic DEGs

| Annotation Cluster | Enrichment Score                                        | Category         | Term                                                                                                                                                                                                   | Count       | Genes                                                                                                                                                                                                                                                                                                                                                            | PValue      | Fold Enrichment | Bonferroni  | Benjamini   | FDR         |
|--------------------|---------------------------------------------------------|------------------|--------------------------------------------------------------------------------------------------------------------------------------------------------------------------------------------------------|-------------|------------------------------------------------------------------------------------------------------------------------------------------------------------------------------------------------------------------------------------------------------------------------------------------------------------------------------------------------------------------|-------------|-----------------|-------------|-------------|-------------|
| 1                  | 2.78525006                                              | UP_KEYWORDS      | Monooxygenase                                                                                                                                                                                          | 7           | CYP2AC1, CYP2J16, CYP2D5, CYP2J10, CH25H, CYP11B2, CYP26A1                                                                                                                                                                                                                                                                                                       | 1.80E-05    | 12.72298951     | 0.00232116  | 0.00232116  | 0.020947609 |
|                    |                                                         | GOTERM_MF_DIRECT | GO:0005506-iron ion binding                                                                                                                                                                            | 8           | CYP2AC1, CYP2J16, CYP2D5, CYP2J10, CH25H, CYP11B2, CYP26A1, AOX4                                                                                                                                                                                                                                                                                                 | 4.83E-05    | 8.242574257     | 0.00894116  | 0.00894116  | 0.059785057 |
|                    |                                                         | UP_KEYWORDS      | Iron                                                                                                                                                                                                   | 8           | CYP2AC1, CYP2J16, CYP2D5, CYP2J10, CH25H, CYP11B2, CYP26A1, AOX4                                                                                                                                                                                                                                                                                                 | 5.12E-04    | 5.671849427     | 0.063935733 | 0.032495857 | 0.593867297 |
|                    |                                                         | GOTERM_MF_DIRECT | GO:0016712-oxidoreductase activity, acting on paired donors, with incorporation or reduction of molecular oxygen, reduced flavin or flavoprotein as one donor, and incorporation of one atom of oxygen | 4           | CYP2AC1, CYP2J16, CYP2D5, CYP2J10                                                                                                                                                                                                                                                                                                                                | 5.53E-04    | 24.48529412     | 0.097827076 | 0.050172161 | 0.683147629 |
|                    |                                                         | UP_KEYWORDS      | Oxidoreductase                                                                                                                                                                                         | 10          | CYP2AC1, FAR2, CYP2J16, CYP2D5, DOXL1, CYP2J10, CH25H, CYP11B2, CYP26A1, AOX4                                                                                                                                                                                                                                                                                    | 7.81E-04    | 4.047220492     | 0.095819479 | 0.033018017 | 0.903946406 |
|                    |                                                         | GOTERM_BP_DIRECT | GO:0055114-oxidation-reduction process                                                                                                                                                                 | 11          | CYP2AC1, FAR2, CYP2J16, CYP2D5, DOXL1, CYP2J10, CH25H, CYP11B2, CYP26A1, AOX4, LOC100361934                                                                                                                                                                                                                                                                      | 8.11E-04    | 3.613296617     | 0.293828426 | 0.067213942 | 1.136129314 |
|                    |                                                         | UP_KEYWORDS      | Heme                                                                                                                                                                                                   | 6           | CYP2AC1, CYP2J16, CYP2D5, CYP2J10, CYP11B2, CYP26A1                                                                                                                                                                                                                                                                                                              | 8.28E-04    | 8.160518053     | 0.101369165 | 0.026366902 | 0.958932859 |
|                    |                                                         | GOTERM_MF_DIRECT | GO:0008395-steroid hydroxylase activity                                                                                                                                                                | 4           | CYP2AC1, CYP2D5, CYP2J10, CH25H                                                                                                                                                                                                                                                                                                                                  | 8.31E-04    | 21.34615385     | 0.143235415 | 0.037910718 | 1.024079818 |
|                    |                                                         | GOTERM_MF_DIRECT | GO:0020037-heme binding                                                                                                                                                                                | 6           | CYP2AC1, CYP2J16, CYP2D5, CYP2J10, CYP11B2, CYP26A1                                                                                                                                                                                                                                                                                                              | 0.001153357 | 7.522590361     | 0.193174731 | 0.0420212   | 1.419080783 |
|                    |                                                         | GOTERM_MF_DIRECT | GO:0008392-arachidonic acid epoxidase activity                                                                                                                                                         | 3           | CYP2AC1, CYP2D5, CYP2J10                                                                                                                                                                                                                                                                                                                                         | 0.011302997 | 18.36397059     | 0.879285773 | 0.260696714 | 13.13228378 |
|                    |                                                         | KEGG_PATHWAY     | rn04726:Serotonergic synapse                                                                                                                                                                           | 4           | CYP2J16, CYP2D5, CYP2J10, KCNJ3                                                                                                                                                                                                                                                                                                                                  | 0.019244869 | 6.782911944     | 0.776042633 | 0.312074611 | 18.53721882 |
| UP_KEYWORDS        | Metal-binding                                           | 17               | S100A3, CYP2D5, DOXL1, CYP11B2, CYP26A1, WT1, MMP12, CYP2AC1, CYP2J16, DYT1, ZSCAN10, CYP2J10, RASGRP4, CH25H, PLA2G2C, AOX4,                                                                          | 0.058942363 | 1.597957578                                                                                                                                                                                                                                                                                                                                                      | 0.999605095 | 0.452742455     | 50.66324709 |             |             |
| KEGG_PATHWAY       | rn01100:Metabolic pathways                              | 8                | CYP2J16, CYP2J10, CHSY3, CYP11B2, CYP26A1, AOX4, PLA2G2C, ACSM5                                                                                                                                        | 0.390193956 | 1.30097615                                                                                                                                                                                                                                                                                                                                                       | 1           | 0.985472333     | 99.45844083 |             |             |
| 2                  | 2.088613795                                             | GOTERM_BP_DIRECT | GO:0030595-leukocyte chemotaxis                                                                                                                                                                        | 4           | CCL3, CCR1, CXCL2, CCL4                                                                                                                                                                                                                                                                                                                                          | 4.15E-05    | 57.02439024     | 0.017651183 | 0.017651183 | 0.05847417  |
|                    |                                                         | GOTERM_BP_DIRECT | GO:0070098-chemokine-mediated signaling pathway                                                                                                                                                        | 5           | CCL12, CCL3, CCR1, CXCL2, CCL4                                                                                                                                                                                                                                                                                                                                   | 1.39E-04    | 18.75802311     | 0.057712152 | 0.029284878 | 0.195048898 |
|                    |                                                         | GOTERM_BP_DIRECT | GO:0030593-neutrophil chemotaxis                                                                                                                                                                       | 5           | CCL12, EDN3, CCL3, CXCL2, CCL4                                                                                                                                                                                                                                                                                                                                   | 1.48E-04    | 18.43460892     | 0.06164315  | 0.020985007 | 0.208751554 |
|                    |                                                         | GOTERM_MF_DIRECT | GO:0008009-chemokine activity                                                                                                                                                                          | 4           | CCL12, CCL3, CXCL2, CCL4                                                                                                                                                                                                                                                                                                                                         | 6.56E-04    | 23.125          | 0.114858994 | 0.039853536 | 0.809107759 |
|                    |                                                         | GOTERM_BP_DIRECT | GO:0007204-positive regulation of cytosolic calcium ion concentration                                                                                                                                  | 6           | CCL3, PTGIR, CCR1, NPY2R, CXCL2, UTS2R                                                                                                                                                                                                                                                                                                                           | 7.77E-04    | 8.22467167      | 0.283630802 | 0.080007629 | 1.089563477 |
|                    |                                                         | GOTERM_BP_DIRECT | GO:0006816-calcium ion transport                                                                                                                                                                       | 5           | CCL12, CCL3, CCR1, TRPC7, RAMP1                                                                                                                                                                                                                                                                                                                                  | 8.67E-04    | 11.62181866     | 0.310797504 | 0.060151599 | 1.215076926 |
|                    |                                                         | UP_KEYWORDS      | Chemotaxis                                                                                                                                                                                             | 4           | CCL12, CCL3, CXCL2, CCL4                                                                                                                                                                                                                                                                                                                                         | 0.001953926 | 15.99461538     | 0.222990755 | 0.049208617 | 2.248863483 |
|                    |                                                         | GOTERM_BP_DIRECT | GO:0006954-inflammatory response                                                                                                                                                                       | 7           | CCL12, CCL3, PTGIR, CCR1, CRHBP, CXCL2, CCL4                                                                                                                                                                                                                                                                                                                     | 0.002515449 | 5.040034491     | 0.66056987  | 0.143032521 | 3.486520618 |
|                    |                                                         | GOTERM_BP_DIRECT | GO:0050729-positive regulation of inflammatory response                                                                                                                                                | 4           | CCL12, CCL3, FABP4, CCL4                                                                                                                                                                                                                                                                                                                                         | 0.003089187 | 13.57723577     | 0.734810962 | 0.152880954 | 4.265765857 |
|                    |                                                         | GOTERM_BP_DIRECT | GO:0071356-cellular response to tumor necrosis factor                                                                                                                                                  | 5           | CCL12, CCL3, CRHBP, FABP4, CCL4                                                                                                                                                                                                                                                                                                                                  | 0.003352616 | 8.03915276      | 0.763235303 | 0.147921395 | 4.621590775 |
|                    |                                                         | GOTERM_MF_DIRECT | GO:0048020-CCR chemokine receptor binding                                                                                                                                                              | 3           | CCL12, CCL3, CCL4                                                                                                                                                                                                                                                                                                                                                | 0.003607263 | 32.86184211     | 0.48939754  | 0.105980173 | 4.376959972 |
|                    |                                                         | GOTERM_BP_DIRECT | GO:0048247-lymphocyte chemotaxis                                                                                                                                                                       | 3           | CCL12, CCL3, CCL4                                                                                                                                                                                                                                                                                                                                                | 0.004585146 | 29.16019956     | 0.860759305 | 0.178936742 | 6.270161484 |
|                    |                                                         | KEGG_PATHWAY     | rn04062:Chemokine signaling pathway                                                                                                                                                                    | 5           | CCL12, CCL3, CCR1, CXCL2, CCL4                                                                                                                                                                                                                                                                                                                                   | 0.008644208 | 9.939838143     | 0.487521998 | 0.487521998 | 8.752807592 |
|                    |                                                         | GOTERM_BP_DIRECT | GO:0051928-positive regulation of calcium ion transport                                                                                                                                                | 3           | CCL3, CCR1, CCL4                                                                                                                                                                                                                                                                                                                                                 | 0.008985264 | 20.69433517     | 0.979185393 | 0.296726288 | 11.94206231 |
|                    |                                                         | GOTERM_BP_DIRECT | GO:0002548-monocyte chemotaxis                                                                                                                                                                         | 3           | CCL12, CCL3, CCL4                                                                                                                                                                                                                                                                                                                                                | 0.009555774 | 20.0476372      | 0.983741497 | 0.290547408 | 12.6536512  |
|                    |                                                         | GOTERM_BP_DIRECT | GO:0006874-cellular calcium ion homeostasis                                                                                                                                                            | 4           | CCL12, EDN3, CCL3, CCR1                                                                                                                                                                                                                                                                                                                                          | 0.010254123 | 8.818204677     | 0.987986545 | 0.288324283 | 13.51741933 |
|                    |                                                         | GOTERM_BP_DIRECT | GO:0071347-cellular response to interleukin-1                                                                                                                                                          | 4           | CCL12, CCL3, CXCL2, CCL4                                                                                                                                                                                                                                                                                                                                         | 0.010543263 | 8.728222997     | 0.989401819 | 0.277321563 | 13.87272103 |
|                    |                                                         | GOTERM_BP_DIRECT | GO:0070374-positive regulation of ERK1 and ERK2 cascade                                                                                                                                                | 5           | CCL12, CCL3, CCR1, NPSR1, CCL4                                                                                                                                                                                                                                                                                                                                   | 0.010816111 | 5.748426436     | 0.990584405 | 0.267305075 | 14.20675702 |
|                    |                                                         | UP_KEYWORDS      | Cytokine                                                                                                                                                                                               | 4           | CCL12, CCL3, CXCL2, CCL4                                                                                                                                                                                                                                                                                                                                         | 0.016967917 | 7.336979534     | 0.890040617 | 0.181838009 | 18.04675189 |
|                    |                                                         | KEGG_PATHWAY     | rn04060:Cytokine-cytokine receptor interaction                                                                                                                                                         | 5           | CCL12, CCL3, IL2RB, CCR1, CCL4                                                                                                                                                                                                                                                                                                                                   | 0.016981556 | 4.867367367     | 0.73254648  | 0.355707949 | 16.53177246 |
|                    |                                                         | GOTERM_BP_DIRECT | GO:0071346-cellular response to interferon-gamma                                                                                                                                                       | 3           | CCL12, CCL3, CCL4                                                                                                                                                                                                                                                                                                                                                | 0.032353005 | 10.51679328     | 0.99999254  | 0.543345902 | 37.08548429 |
| KEGG_PATHWAY       | rn05132:Salmonella infection                            | 3                | CCL3, CXCL2, CCL4                                                                                                                                                                                      | 0.05608021  | 7.600130251                                                                                                                                                                                                                                                                                                                                                      | 0.988250969 | 0.523202824     | 45.60607196 |             |             |
| GOTERM_CC_DIRECT   | GO:0005615-extracellular space                          | 11               | CCL12, EDN3, CCL3, LOC689081, SCUBE2, C6, CRHBP, CXCL2, DCN, CCL4, RAMP1                                                                                                                               | 0.05649448  | 1.911141131                                                                                                                                                                                                                                                                                                                                                      | 0.991507325 | 0.907844287     | 46.27320078 |             |             |
| GOTERM_BP_DIRECT   | GO:0007267-cell-cell signaling                          | 3                | CCL12, CCL3, CCR1                                                                                                                                                                                      | 0.058821666 | 7.547345768                                                                                                                                                                                                                                                                                                                                                      | 1           | 0.745586769     | 57.43667664 |             |             |
| UP_KEYWORDS        | Inflammatory response                                   | 3                | CCL3, CXCL2, CCL4                                                                                                                                                                                      | 0.059845214 | 7.497475962                                                                                                                                                                                                                                                                                                                                                      | 0.999651087 | 0.433693879     | 51.21091535 |             |             |
| GOTERM_BP_DIRECT   | GO:0006887-exocytosis                                   | 3                | CCL12, CCL3, CCR1                                                                                                                                                                                      | 0.062522391 | 7.290049889                                                                                                                                                                                                                                                                                                                                                      | 1           | 0.749642053     | 59.73504921 |             |             |
| UP_KEYWORDS        | Secreted                                                | 10               | CCL12, EDN3, CCL3, C6, CRHBP, CXCL2, PLA2G2C, DCN, CCL4, MMP12                                                                                                                                         | 0.074472141 | 1.913231505                                                                                                                                                                                                                                                                                                                                                      | 0.999953842 | 0.444152593     | 59.34373128 |             |             |
| GOTERM_BP_DIRECT   | GO:0006955-immune response                              | 4                | C6, CCR1, CXCL2, CCL4                                                                                                                                                                                  | 0.126111411 | 3.203617429                                                                                                                                                                                                                                                                                                                                                      | 1           | 0.910148109     | 85.03378729 |             |             |
| GOTERM_BP_DIRECT   | GO:0043547-positive regulation of GTPase activity       | 4                | CCL12, CCL3, RASGRP4, CCL4                                                                                                                                                                             | 0.279077035 | 2.149160436                                                                                                                                                                                                                                                                                                                                                      | 1           | 0.995479711     | 99.00540994 |             |             |
| GOTERM_BP_DIRECT   | GO:0007186-G-protein coupled receptor signaling pathway | 11               | CCL12, CCL3, OLR1595, CCR1, NPY2R, CXCL2, VOM1R66, GNRHR, OLR1588, CCL4, RAMP1                                                                                                                         | 0.467799055 | 1.156468091                                                                                                                                                                                                                                                                                                                                                      | 1           | 0.999955573     | 99.98618386 |             |             |
| 3                  | 1.50449054                                              | UP_KEYWORDS      | Transmembrane helix                                                                                                                                                                                    | 43          | MILL1, CYP2D5, SYNDIG1, RGD1304770, NPY2R, CCR1, GNRHR, LY9, KCNJ3, SLC5A3, CLEC10A, CNTNAP5B, FAR2, PTGIR, CYP2J16, CYP2J10, CH25H, OLR1595, NPSR1, MUC15, RAMP1, IL2RB, TMCO5A, CLCA5, TRPC7, TMEM200A, SLC7A10, LOC100361934, SLC6A16, CACNG1, GJB1, PKD2L2, SYNGR4, CYP2AC1, CLIC5, VOM1R66, SCN11A, PLA2G2C, UTS2R, EQTN, OLR1588, SMPD5, TMCO3             | 0.01078468  | 1.39066738      | 0.75310189  | 0.1604149   | 11.8474471  |
|                    |                                                         | UP_KEYWORDS      | Transmembrane                                                                                                                                                                                          | 43          | MILL1, CYP2D5, SYNDIG1, RGD1304770, NPY2R, CCR1, GNRHR, LY9, KCNJ3, SLC5A3, CLEC10A, CNTNAP5B, FAR2, PTGIR, CYP2J16, CYP2J10, CH25H, OLR1595, NPSR1, MUC15, RAMP1, IL2RB, TMCO5A, CLCA5, TRPC7, TMEM200A, SLC7A10, LOC100361934, SLC6A16, CACNG1, GJB1, PKD2L2, SYNGR4, CYP2AC1, CLIC5, VOM1R66, SCN11A, PLA2G2C, UTS2R, EQTN, OLR1588, SMPD5, TMCO3             | 0.01162878  | 1.38484307      | 0.7788477   | 0.15435528  | 12.7182778  |
|                    |                                                         | UP_KEYWORDS      | Membrane                                                                                                                                                                                               | 45          | MILL1, CYP2D5, SYNDIG1, RGD1304770, CYP11B2, NPY2R, CCR1, GNRHR, LY9, KCNJ3, SLC5A3, CLEC10A, CNTNAP5B, FAR2, PTGIR, CYP2J16, CYP2J10, RASGRP4, CH25H, OLR1595, NPSR1, MUC15, RAMP1, IL2RB, TMCO5A, CLCA5, TRPC7, TMEM200A, SLC7A10, LOC100361934, SLC6A16, CACNG1, GJB1, PKD2L2, SYNGR4, CYP2AC1, CLIC5, VOM1R66, SCN11A, PLA2G2C, UTS2R, EQTN, OLR1588, SMPD5, | 0.0629416   | 1.2361873       | 0.99977202  | 0.42826702  | 53.0472463  |
|                    |                                                         | GOTERM_CC_DIRECT | GO:0016021-integral component of membrane                                                                                                                                                              | 31          | MILL1, CYP2D5, RGD1304770, CCR1, GNRHR, LY9, CLEC10A, CNTNAP5B, FAR2, CYP2J16, CYP2J10, CH25H, OLR1595, MUC15, RAMP1, IL2RB, TRPC7, TMCO5A, TMEM200A, SLC7A10, LOC100361934, GJB1, PKD2L2, SYNGR4, CYP2AC1, VOM1R66, PLA2G2C, EQTN,                                                                                                                              | 0.12155102  | 1.24109635      | 0.99997575  | 0.9710542   | 74.9553451  |
| 4                  | 1.16521401                                              | KEGG_PATHWAY     | rn00591:Linoleic acid metabolism                                                                                                                                                                       | 3           | CYP2J16, CYP2J10, PLA2G2C                                                                                                                                                                                                                                                                                                                                        | 0.01524428  | 15.3856295      | 0.69359533  | 0.44646168  | 14.9622308  |
|                    |                                                         | KEGG_PATHWAY     | rn00590:Arachidonic acid metabolism                                                                                                                                                                    | 3           | CYP2J16, CYP2J10, PLA2G2C                                                                                                                                                                                                                                                                                                                                        | 0.05369953  | 7.78778779      | 0.98573613  | 0.57258726  | 44.1410979  |
|                    |                                                         | KEGG_PATHWAY     | rn01100:Metabolic pathways                                                                                                                                                                             | 8           | CYP2J16, CYP2J10, CHSY3, CYP11B2, CYP26A1, AOX4, PLA2G2C, ACSM5                                                                                                                                                                                                                                                                                                  | 0.39019396  | 1.30097615      | 1           | 0.98547233  | 99.4584408  |
| 5                  | 1.04968679                                              | GOTERM_BP_DIRECT | GO:0034765-regulation of ion transmembrane transport                                                                                                                                                   | 4           | CLIC5, SCN11A, CACNG1, KCNJ3                                                                                                                                                                                                                                                                                                                                     | 0.01113567  | 8.55365854      | 0.9918031   | 0.25936695  | 14.5964486  |
|                    |                                                         | UP_KEYWORDS      | Voltage-gated channel                                                                                                                                                                                  | 4           | CLIC5, SCN11A, CACNG1, KCNJ3                                                                                                                                                                                                                                                                                                                                     | 0.02632655  | 6.19946333      | 0.96798752  | 0.24933999  | 26.6748256  |
|                    |                                                         | UP_KEYWORDS      | Ion channel                                                                                                                                                                                            | 4           | CLIC5, SCN11A, CACNG1, KCNJ3                                                                                                                                                                                                                                                                                                                                     | 0.18143537  | 2.70179314      | 1           | 0.76183407  | 90.2534295  |
|                    |                                                         | UP_KEYWORDS      | Transport                                                                                                                                                                                              | 10          | LOC690507, RGD1304770, CLIC5, SLC7A10, FABP4, SCN11A, CACNG1, KCNJ3, SLC5A3, RAMP1                                                                                                                                                                                                                                                                               | 0.22451635  | 1.48208074      | 1           | 0.79027001  | 94.802578   |
|                    |                                                         | UP_KEYWORDS      | Ion transport                                                                                                                                                                                          | 4           | CLIC5, SCN11A, CACNG1, KCNJ3                                                                                                                                                                                                                                                                                                                                     | 0.47259147  | 1.54986583      | 1           | 0.97651601  | 99.9412893  |
| 6                  | 0.69996768                                              | GOTERM_BP_DIRECT | GO:0007204-positive regulation of cytosolic calcium ion concentration                                                                                                                                  | 6           | CCL3, PTGIR, CCR1, NPY2R, CXCL2, UTS2R                                                                                                                                                                                                                                                                                                                           | 7.77E-04    | 8.22467167      | 0.2836308   | 0.08000763  | 1.08956348  |
|                    |                                                         | GOTERM_BP_DIRECT | GO:0007218-neuropeptide signaling pathway                                                                                                                                                              | 3           | NPY2R, NPSR1, UTS2R                                                                                                                                                                                                                                                                                                                                              | 0.07407738  | 6.61365351      | 1           | 0.79242803  | 66.190786   |
|                    |                                                         | KEGG_PATHWAY     | rn04080:Neuroactive ligand-receptor interaction                                                                                                                                                        | 4           | PTGIR, NPY2R, GNRHR, UTS2R                                                                                                                                                                                                                                                                                                                                       | 0.15144746  | 2.88041466      | 0.99999678  | 0.79415854  | 82.3185207  |
|                    |                                                         | GOTERM_CC_DIRECT | GO:0005886-plasma membrane                                                                                                                                                                             | 17          | MILL1, CCR1, NPY2R, CLCA5, GNRHR, LY9, GJB1, PTGIR, CD163L1, RASGRP4, OLR1595, SCN11A, C2CD4A, EQTN, UTS2R, OLR1588, RAMP1                                                                                                                                                                                                                                       | 0.66301332  | 0.9808008       | 1           | 0.99998561  | 99.9991017  |
|                    |                                                         | UP_KEYWORDS      | Receptor                                                                                                                                                                                               | 12          | PTGIR, IL2RB, OLR1595, CCR1, NPY2R, TRPC7, VOM1R66, GNRHR, NPSR1, UTS2R, OLR1588, RAMP1                                                                                                                                                                                                                                                                          | 0.72381115  | 0.94717422      | 1           | 0.99900807  | 99.9999683  |
|                    |                                                         | UP_KEYWORDS      | G-protein coupled receptor                                                                                                                                                                             | 8           | PTGIR, OLR1595, CCR1, NPY2R, GNRHR, NPSR1, UTS2R, OLR1588                                                                                                                                                                                                                                                                                                        | 0.78790489  | 0.89958467      | 1           | 0.99954443  | 99.9999985  |
|                    |                                                         | UP_KEYWORDS      | Transducer                                                                                                                                                                                             | 8           | PTGIR, OLR1595, CCR1, NPY2R, GNRHR, NPSR1, UTS2R, OLR1588                                                                                                                                                                                                                                                                                                        | 0.81446598  | 0.87164117      | 1           | 0.99957389  | 99.9999997  |
| UP_KEYWORDS        | Cell membrane                                           | 11               | PTGIR, SYNDIG1, RASGRP4, OLR1595, SCN11A, GNRHR, NPSR1, UTS2R, OLR1588, SLC5A3, GJB1                                                                                                                   | 0.93598591  | 0.74024221                                                                                                                                                                                                                                                                                                                                                       | 1           | 0.99998922      | 100         |             |             |
| 7                  | 0.42445962                                              | GOTERM_CC_DIRECT | GO:0022625-cytosolic large ribosomal subunit                                                                                                                                                           | 3           | RPL32, LOC680700, LOC306079                                                                                                                                                                                                                                                                                                                                      | 0.17024119  | 3.98794143      | 0.99999977  | 0.97819714  | 86.3808438  |
|                    |                                                         | GOTERM_BP_DIRECT | GO:0006412-translation                                                                                                                                                                                 | 3           | RPL32, LOC680700, LOC306079                                                                                                                                                                                                                                                                                                                                      | 0.52393102  | 1.69715447      | 1           | 0.99998848  | 99.9971269  |
|                    |                                                         | GOTERM_MF_DIRECT | GO:0003735-structural constituent of ribosome                                                                                                                                                          | 3           | RPL32, LOC680700, LOC306079                                                                                                                                                                                                                                                                                                                                      | 0.59742361  | 1.48307601      | 1           | 0.99999996  | 99.9987233  |
| 8                  | 0.09034559                                              | UP_KEYWORDS      | Zinc                                                                                                                                                                                                   | 6           | S100A3, DYT1, ZSCAN10, RASGRP4, MMP12, WT1                                                                                                                                                                                                                                                                                                                       | 0.74582191  | 0.96353105      | 1           | 0.99914786  | 99.9999879  |
|                    |                                                         | UP_KEYWORDS      | Zinc-finger                                                                                                                                                                                            | 4           | DYT1, ZSCAN10, RASGRP4, WT1                                                                                                                                                                                                                                                                                                                                      | 0.79724718  | 0.94196793      | 1           | 0.99951153  | 99.9999991  |
|                    |                                                         | GOTERM_MF_DIRECT | GO:0046872-metal ion binding                                                                                                                                                                           | 5           | ZSCAN10, RASGRP4, AOX4, ACSM5, WT1                                                                                                                                                                                                                                                                                                                               | 0.90102139  | 0.75571895      | 1           | 1           | 100         |
| 9                  | 0.03277957                                              | GOTERM_BP_DIRECT | GO:0006355-regulation of transcription, DNA-templated                                                                                                                                                  | 4           | ZSCAN10, RHOX5, PERM1, WT1                                                                                                                                                                                                                                                                                                                                       | 0.87241314  | 0.81154256      | 1           | 1           | 100         |
|                    |                                                         | UP_KEYWORDS      | Transcription regulation                                                                                                                                                                               | 3           | ZSCAN10, RHOX5, WT1                                                                                                                                                                                                                                                                                                                                              | 0.92063013  | 0.72352         | 1           | 0.99998725  | 100         |
|                    |                                                         | UP_KEYWORDS      | Transcription                                                                                                                                                                                          | 3           | ZSCAN10, RHOX5, WT1                                                                                                                                                                                                                                                                                                                                              | 0.93533515  | 0.68314132      | 1           | 0.99999231  | 100         |
|                    |                                                         | UP_KEYWORDS      | Nucleus                                                                                                                                                                                                | 7           | ZSCAN10, RHOX5, ETV2, FABP4, LOC100360260, WT1, PSMB11                                                                                                                                                                                                                                                                                                           | 0.9842538   | 0.58023584      | 1           | 0.99999977  | 100         |
